# Supplementary material for: De novo Induction of Genetically Engineered Brain Tumors in Mice Using Plasmid DNA
Source: Oxford University Press journal article supplement (doi:10.1158/0008-5472.can-08-1800), 2009-01-15
Supplement: 00085472can081800-sup-can_1-15-09_wiesner.pdf [file 00085472can081800-sup-can_1-15-09_wiesner.pdf]

## I. Supplementary Figures

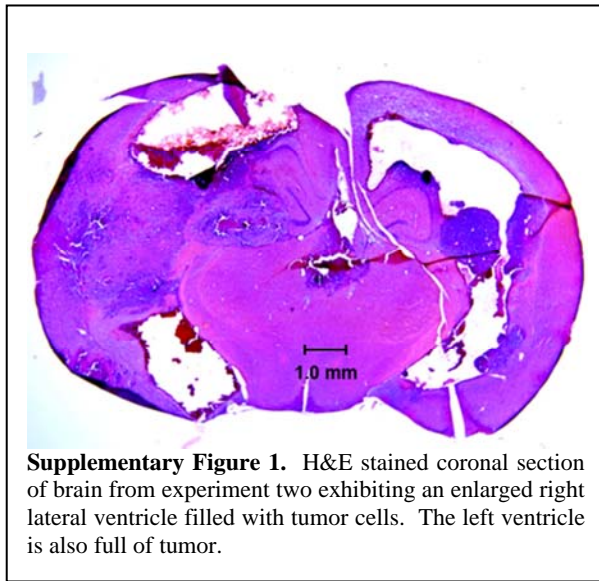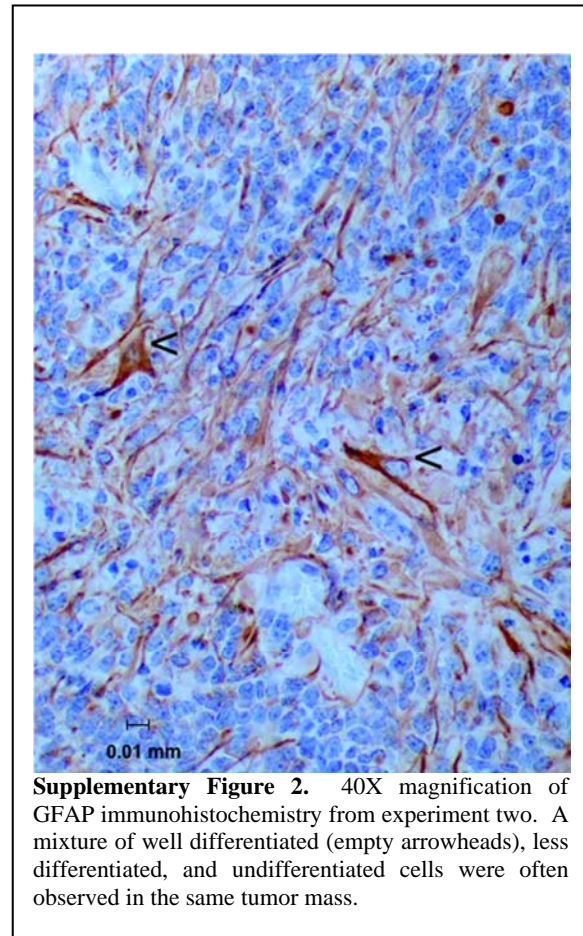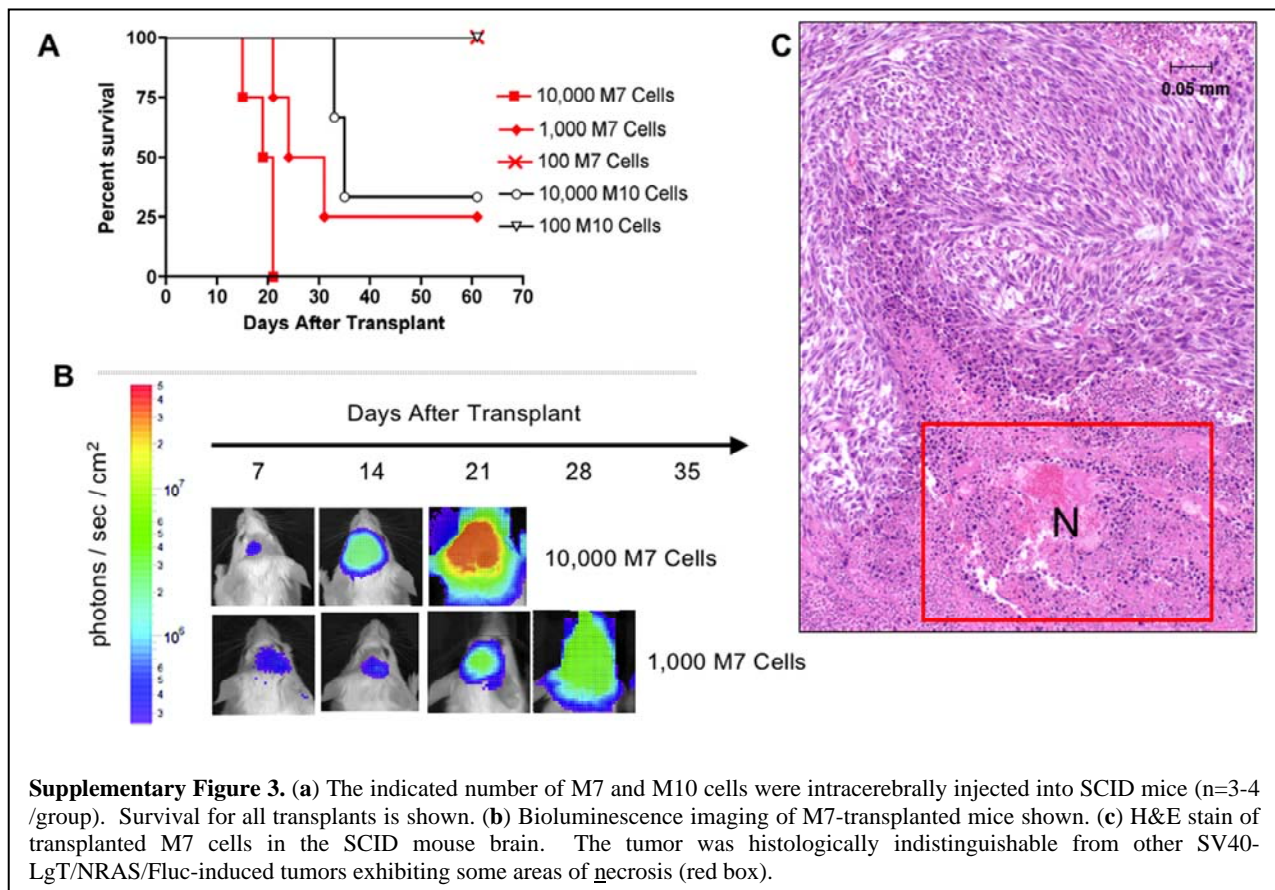

**A**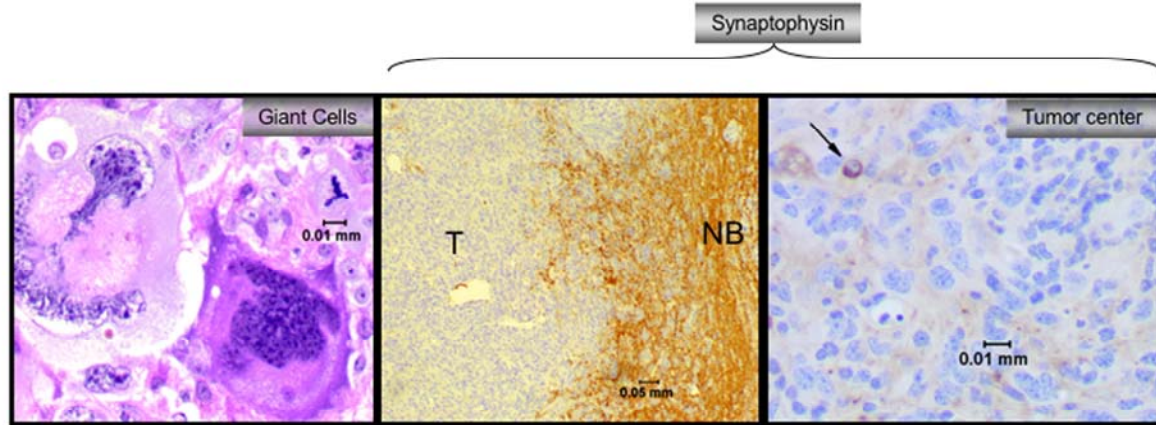**B**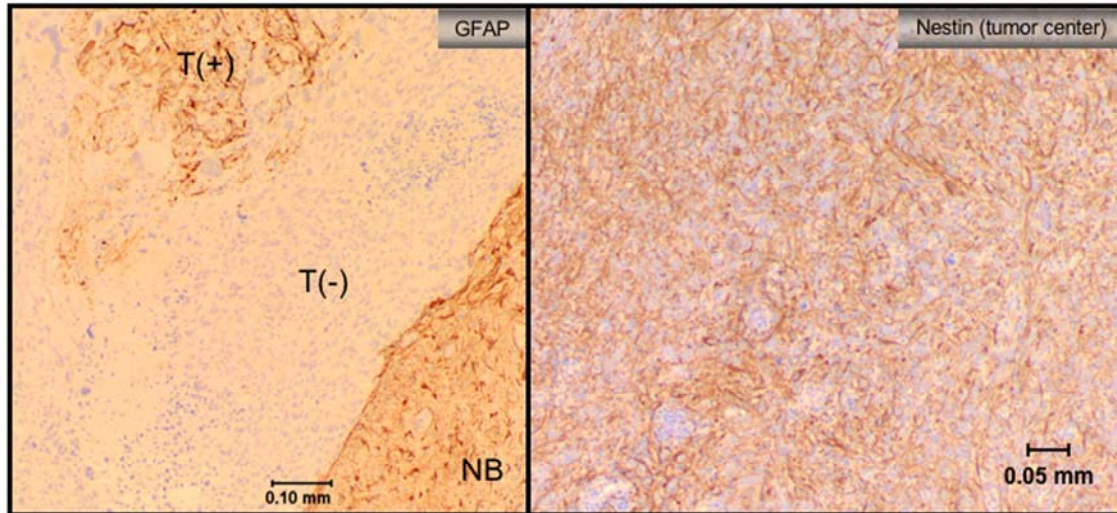

**Supplementary Figure 4.** (a) Representative images of giant cells from tumors in experiment 14 are shown in the left panel. Other panels show that the bulk tumor mass (T) is essentially negative for the neuronal marker synaptophysin but the normal brain (NB) is positive. However, rarely positive cells were observed in the tumor (arrow). (b) Image in left panel depicts the typical heterogeneity of GFAP expression observed in these tumors. Normal brain can be seen in lower right of image, with very organized GFAP positive astrocytes next to a well demarcated portion of the tumor that is negative for GFAP “T (-)” on the periphery but positive for GFAP in the tumor center “T (+)”. In contrast, the entire tumor mass is uniformly positive for nestin.



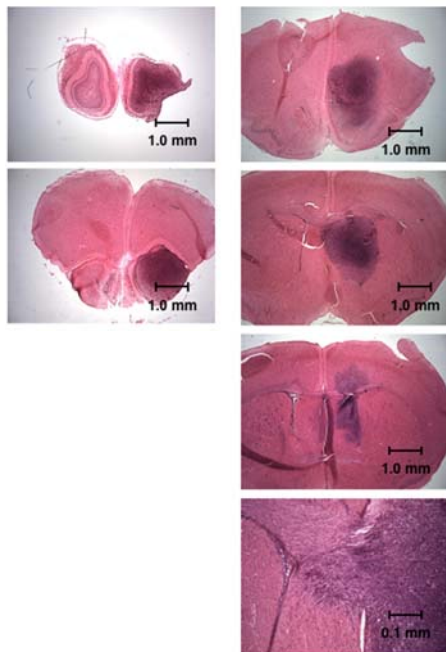

**Supplementary Figure 5.** Serial coronal sections of brains from different mice four weeks post transfection. In some animals, focal luminescence was noted between the eyes when viewed caudally (data not shown). Tumor was present in the olfactory bulbs (Top, left column) of these mice and extended into the parenchyma (bottom, left column). Note the contralateral olfactory bulb is unaffected. Tissues harvested four weeks post transfection that demonstrated detectable *in vivo* bioluminescence always had detectable tumor by H&E stain that typically originated around or near the lateral ventricle (right column). Tumor was present throughout the majority of the cerebrum and occasionally entered the contralateral hemisphere via the corpus callosum (Bottom, right column).

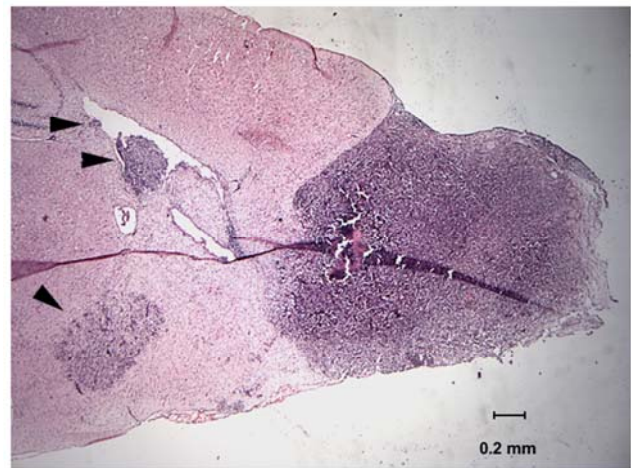

**Supplementary Figure 6.** Sagittal section of affected brain harvested four weeks post transfection from a different animal that demonstrated focal bioluminescence located between the eyes when viewed caudally. Olfactory bulb is completely replaced by tumor cells. Several other foci are evident (arrowheads), notably in or near the subventricular zone of the lateral ventricle.

## II. Supplementary Tables

**Supplementary Table I. Grade of GEM Astrocytoma Induced by Oncogene Transfer**

| Oncogenes                 | Grade 3     | Grade 4    | <sup>a</sup> Experiment(s) # |
|---------------------------|-------------|------------|------------------------------|
| SV40-LgT + NRAS GV12      | 10/13 (77%) | 3/13 (23%) | 1, 2, 3, 20                  |
| AKT + NRAS GV12 + shp53   | 3/5 (60%)   | 2/5 (40%)  | 13                           |
| NRAS GV12 + shp53         | 1/3 (33%)   | 2/3 (66%)  | 17                           |
| NRAS GV12 +EGFRvIII+shP53 | 4/7 (57%)   | 3/7 (43%)  | 14                           |

<sup>a</sup> Refers to mice identified by the experiment number shown in left column of Table I

**Supplementary Table II. Map Positions of SB-mediated Integrations**

| Cell Line | Chromosome | Gene               | Location Relative to Gene | Distance (bp) | Transposon Orientation Relative to Gene |
|-----------|------------|--------------------|---------------------------|---------------|-----------------------------------------|
| M2        | 1          | Cep170             | downstream                | 55585         | +                                       |
| M2        | 3          | Nhedc1             | exon 5                    | NA            | -                                       |
| M2        | 4          | 6230409E13Rik      | upstream                  | 8579          | +                                       |
| M2        | 5          | Glt1d1             | intron 1                  | NA            | -                                       |
| M2        | 11         | Adra1b             | upstream                  | 36848         | +                                       |
| M2        | 12         | Serpina5           | upstream                  | 8326          | +                                       |
| M2        | 14         | 9030625A04Rik      | downstream                | 101371        | -                                       |
| M2        | 18         | ENSMUSG00000069391 | downstream                | 52477         | +                                       |
| M2        | 5          | Gm444              | upstream                  | 2720          | +                                       |
| M7        | 1          | 2700049P18Rik      | downstream                | 31879         | +                                       |
| M7        | 1          | Zfp281             | upstream                  | 1552          | +                                       |
| M7        | 1          | ENSMUSG00000064860 | upstream                  | 46145         | -                                       |
| M7        | 3          | S100a11            | intron 2                  | NA            | +                                       |
| M7        | 3          | Atp11b             | Introns 9                 | NA            | +                                       |
| M7        | 4          | Tie1               | downstream                | 238406        | +                                       |
| M7        | 4          | ENSMUSG00000077214 | downstream                | 141025        | -                                       |
| M7        | 4          | ENSMUSG00000068029 | upstream                  | 119035        | +                                       |
| M7        | 4          | 4933407E24Rik      | upstream                  | 38850         | -                                       |
| M7        | 5          | ENSMUSG00000070220 | upstream                  | 379132        | -                                       |
| M7        | 5          | Tmem132d           | intron 2                  | NA            | -                                       |
| M7        | 6          | Grm7               | intron 4                  | NA            | +                                       |
| M7        | 6          | Tnpo3              | upstream                  | 25517         | +                                       |
| M7        | 6          | Pde3a              | intron 2                  | NA            | -                                       |
| M7        | 8          | Gm1698             | downstream                | 72588         | -                                       |
| M7        | 11         | Fxr2               | upstream                  | 3660          | -                                       |
| M7        | 11         | Olfr1395           | upstream                  | 4328          | -                                       |
| M7        | 12         | Ctage5             | intron1                   | NA            | +                                       |
| M7        | 12         | ENSMUSG00000077292 | upstream                  | 40219         | -                                       |
| M7        | 12         | Akap6              | upstream                  | 11445         | -                                       |
| M7        | 13         | Calm4              | upstream                  | 16382         | -                                       |
| M7        | 14         | ENSMUSG00000077636 | downstream                | 197194        | +                                       |
| M7        | 15         | L3mbtl2            | intron 3                  | 5758          | +                                       |
| M7        | 17         | ENSMUSG00000071033 | upstream                  | 61977         | -                                       |
| M7        | 19         | Prune2             | upstream                  | 24641         | -                                       |
| M7        | 19         | E030010A14Rik      | intron 1                  | 3463          | -                                       |
| M7        | 19         | Sorbs1             | intron 20                 | NA            | +                                       |
| M7        | X          | 4930447F04Rik      | downstream                | 55143         | +                                       |
| M10       | 1          | ENSMUSG00000077207 | downstream                | 13892         | -                                       |
| M10       | 2          | Ehf                | downstream                | 15459         | +                                       |
| M10       | 2          | Phf21a             | intron 4                  | NA            | +                                       |
| M10       | 2          | A2AJX4_MOUSE       | intron 4                  | NA            | +                                       |
| M10       | 2          | Chac1              | upstream                  | 2794          | +                                       |
| M10       | 3          | Trpc3              | upstream                  | 103101        | -                                       |
| M10       | 4          | 4930473A06Rik      | intron 6                  | NA            | +                                       |
| M10       | 4          | Ppap2b             | downstream                | 120325        | +                                       |
| M10       | 16         | Zbtb20             | intron 10                 | NA            | -                                       |
